# Supplementary material for: A multifunctional integrated carbon nanotubes/polyphenylene sulfide composite: preparation, properties and applications
Source: Royal Society of Chemistry journal article supplement (doi:10.1039/d2na00855f), 2023-01-01
Supplement: d2na00855f1.pdf [file d2na00855f1.pdf]

**Multifunctional integrated carbon nanotubes/polyphenylene sulfide composite:  
Preparation, properties and applications**

Lingpu Jia<sup>a\*</sup>, Juan Hao<sup>b</sup>, Qingliang Feng<sup>c</sup>, Huiming Li<sup>d</sup>, Kunping Liu<sup>b\*</sup>

a Key Laboratory of Medicinal and Edible Plants Resources Development of Sichuan Education Department, Institute for Advanced Study, Chengdu University, Chengdu 610106, China.

b Key Laboratory of Medicinal and Edible Plants Resources Development of Sichuan Education Department, Sichuan Industrial Institute of Antibiotics, School of pharmacy, Chengdu University, Chengdu 610106, China.

c Key Laboratory of Special Functional and Smart Polymer Materials of Ministry of Industry and Information Technology, School of Chemistry and Chemical Engineering, Northwestern Polytechnical University, Xi'an 710072, Shaanxi, China

d School of Food and Biological Engineering, Chengdu University, Chengdu 610106, China.

Corresponding author: [jialingpu@cdu.edu.cn](mailto:jialingpu@cdu.edu.cn)

[liukunping@cdu.edu.cn](mailto:liukunping@cdu.edu.cn)

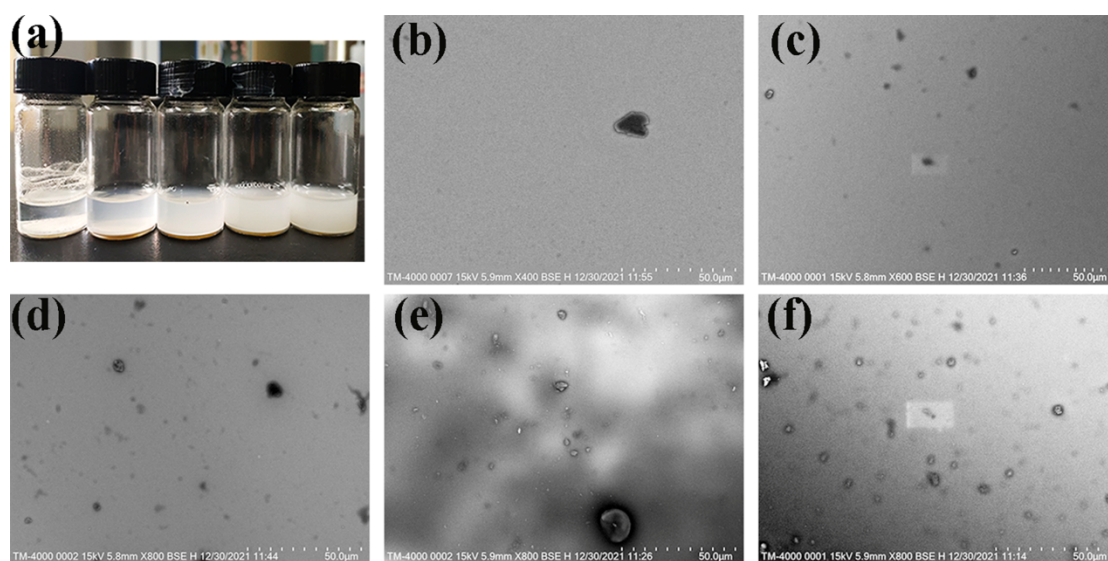

Figure S1. Dispersion photo (a) and SEM (b-f) of 0.1g PPS in 5.00 mL PVA with different concentrations (0.01, 0.05, 0.08, 0.10, 0.12 g mL<sup>-1</sup>) after 12 h.

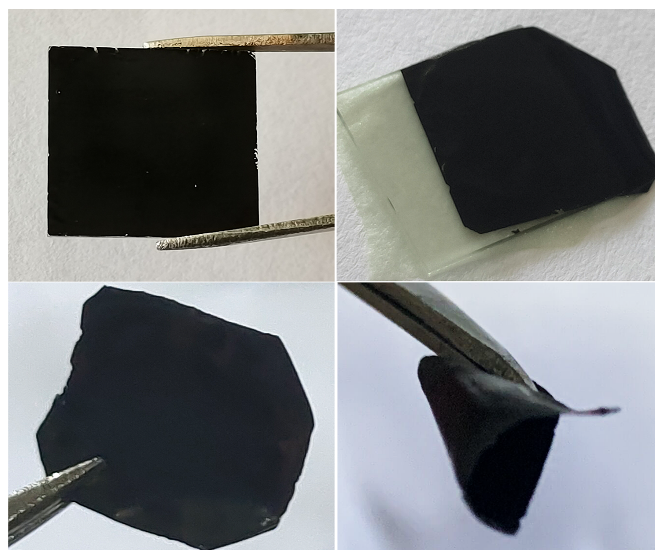

Figure S2. the picture of CNTs-PPS/PVA film.

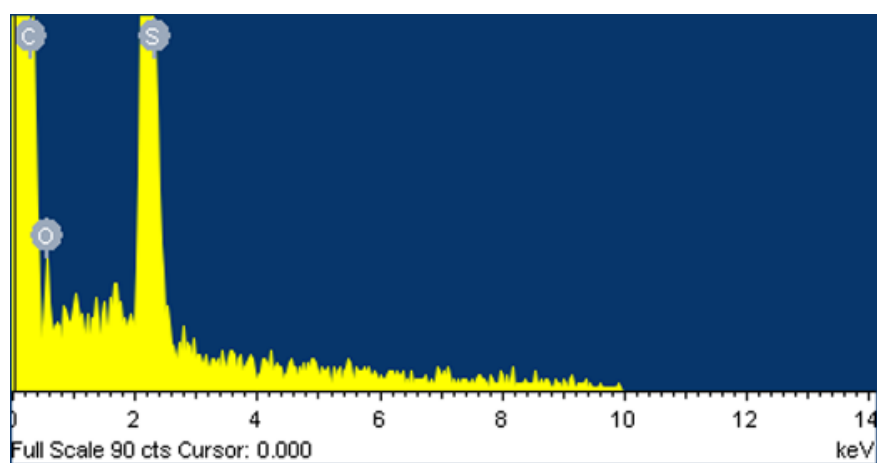

Figure S3 The energy dispersive spectroscopy of CNTs-PPS/PVA film.

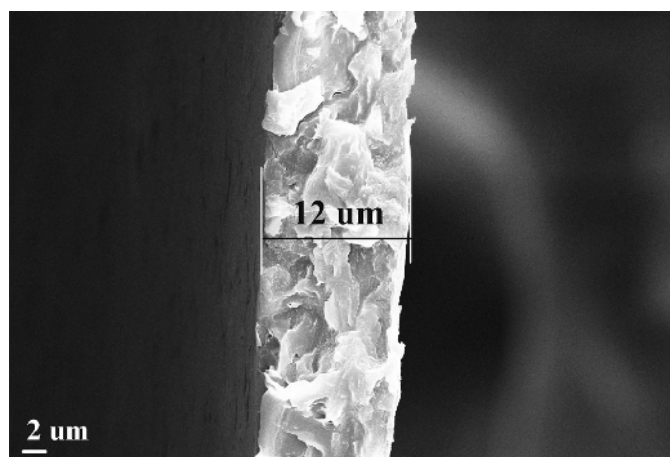

Figure S4 the cross section of CNTs/PPS-PVA film.

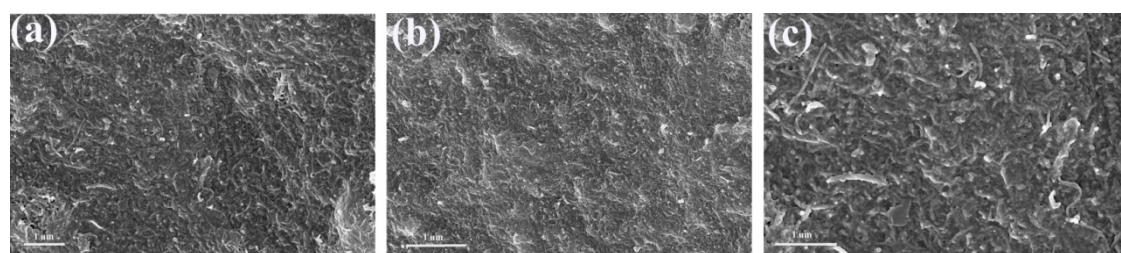

Figure S5 SEM of CNTs-PPS/PVA films after immersed in (a) 6 M  $\text{H}_2\text{SO}_4$ , (b)  $\text{HNO}_3$  and (c) KOH for 30 days
